# Supplementary material
Source: Frontiers journal article supplement (https://www.frontiersin.org/articles/471343)
Supplement: Data_Sheet_4.PDF [file Data_Sheet_4.PDF]

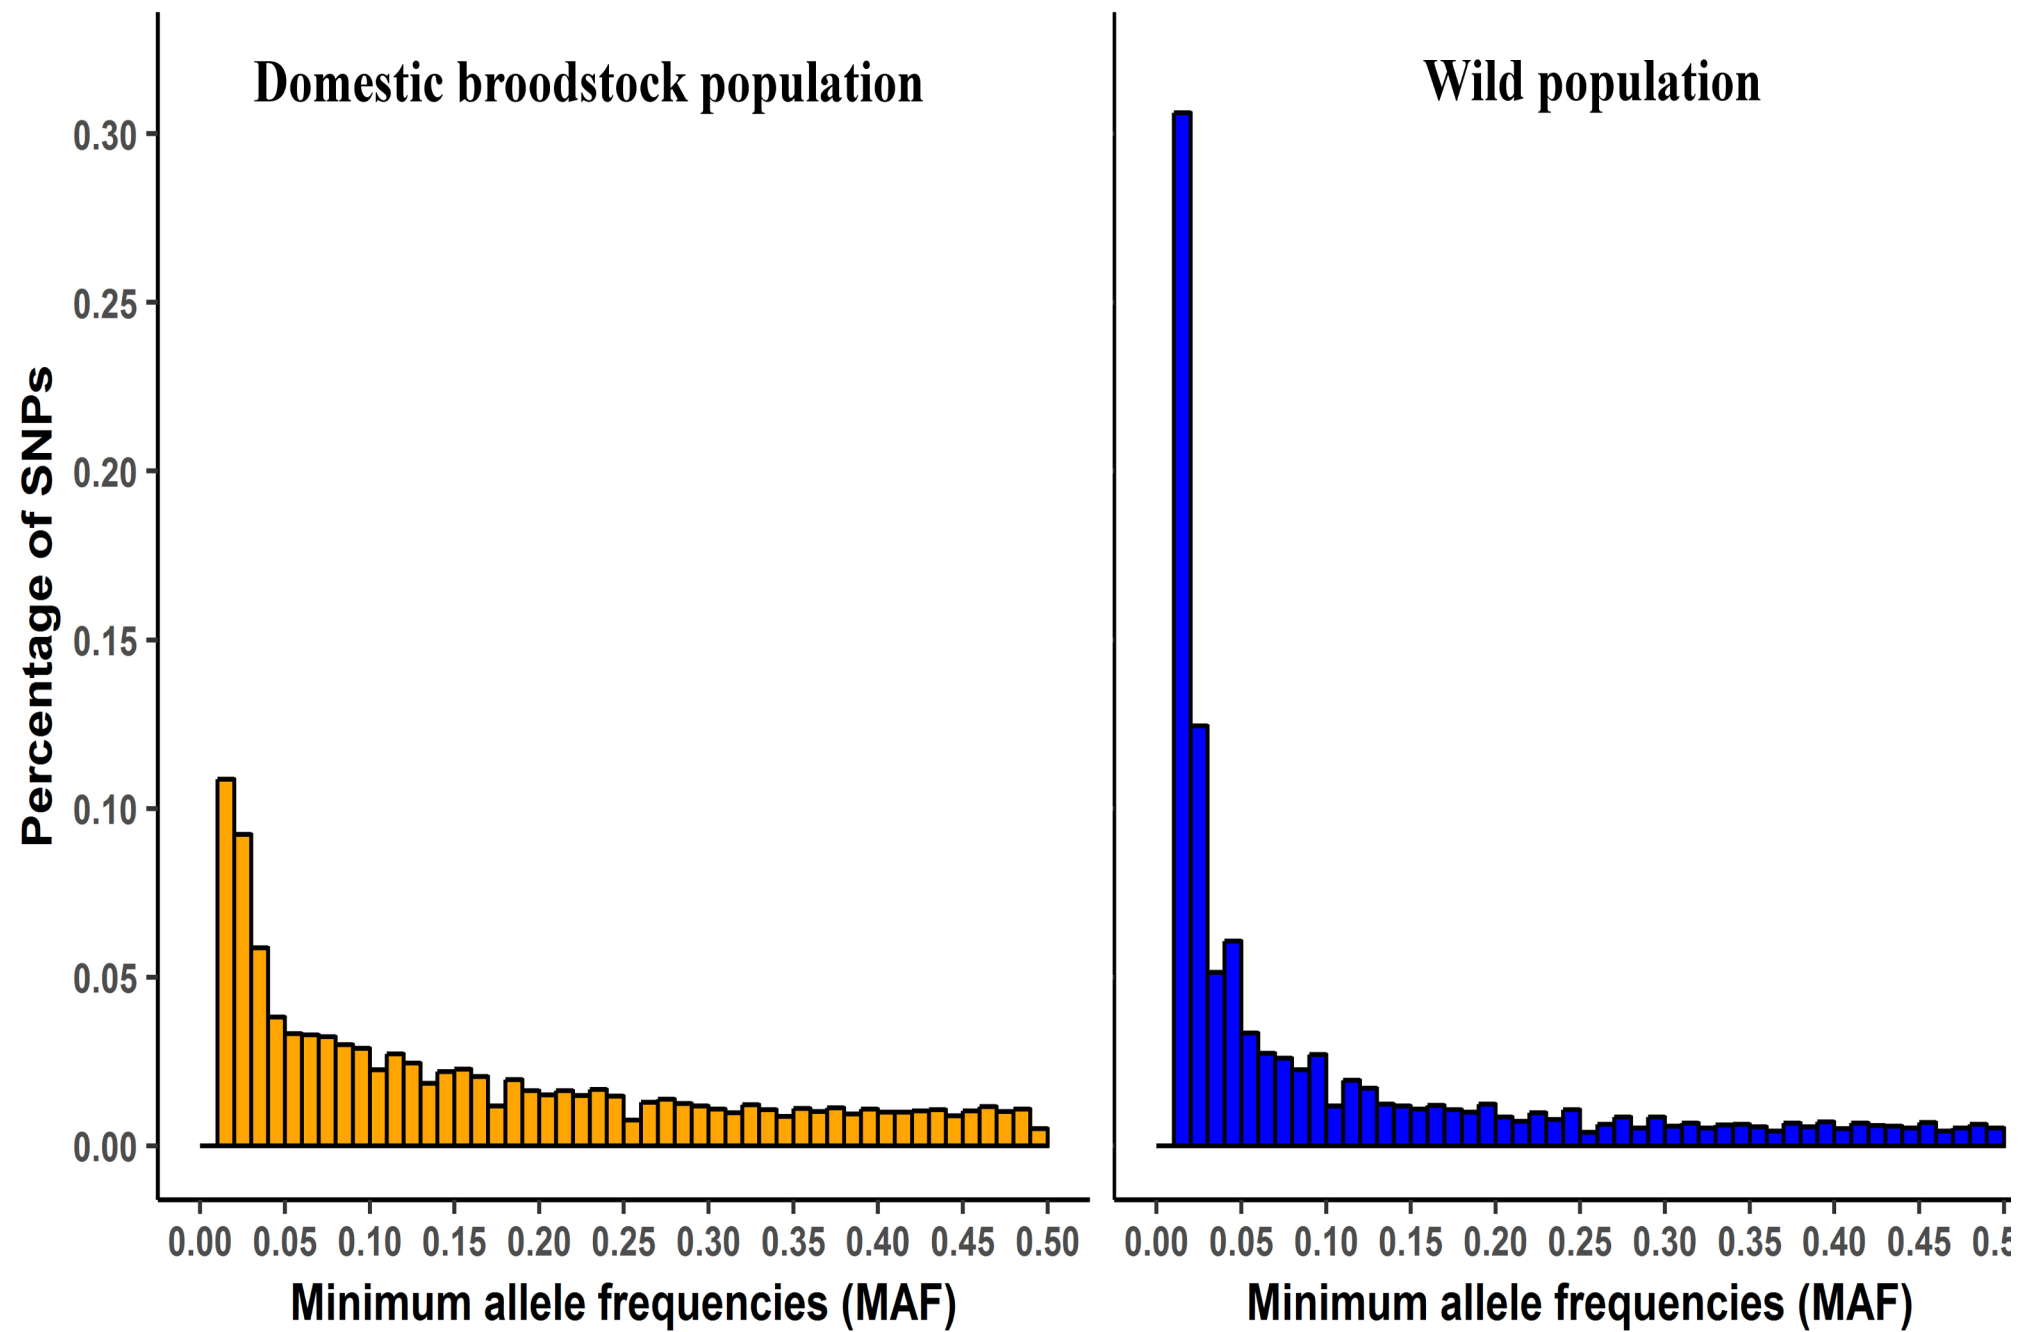

**Supplementary Figure 4. Distribution of the Minimum Allele Frequency per SNP (MAF) in the broodstock and wild populations.**
